# Supplementary material for: Intramolecular Interactions in Derivatives of Uracil Tautomers
Source: MDPI journal article supplement (doi:10.3390/molecules27217240), 2022-10-25
Supplement: s1 [file s1]

# Supplementary Materials

## Intramolecular interactions in derivatives of uracil tautomers

Paweł A. Wieczorkiewicz<sup>1</sup>, Tadeusz M. Krygowski<sup>2</sup> and Halina Szatylowicz<sup>1</sup>

<sup>1</sup> Faculty of Chemistry, Warsaw University of Technology, Noakowskiego 3, 00-664 Warsaw, Poland

<sup>2</sup> Department of Chemistry, University of Warsaw, Pasteura 1, 02-093 Warsaw, Poland

### Table of Contents

|                                                                                                                                                                                                                                   |   |
|-----------------------------------------------------------------------------------------------------------------------------------------------------------------------------------------------------------------------------------|---|
| Table S1. Dipole moments                                                                                                                                                                                                          | 2 |
| Table S2. Relative energies of 5-NH <sub>2</sub> uracil tautomers in all studied environments                                                                                                                                     | 2 |
| Table S3. Solvation energies of 5-NH <sub>2</sub> uracil tautomers in all studied environments                                                                                                                                    | 2 |
| Table S4. Relative Gibbs energies 5-NH <sub>2</sub> uracil tautomers in all studied environments                                                                                                                                  | 2 |
| Table S5. Solvation Gibbs energies of 5-NH <sub>2</sub> uracil tautomers in all studied environments                                                                                                                              | 2 |
| Table S6. Relative energies of 5-NO <sub>2</sub> uracil tautomers in all studied environments                                                                                                                                     | 3 |
| Table S7. Solvation energies of 5-NO <sub>2</sub> uracil tautomers in all studied environments                                                                                                                                    | 3 |
| Table S8. Relative Gibbs energies of 5-NO <sub>2</sub> uracil tautomers in all studied environments                                                                                                                               | 3 |
| Table S9. Solvation Gibbs energies of 5-NO <sub>2</sub> uracil tautomers in all studied environments                                                                                                                              | 3 |
| Table S10. Relative energies of 5-NO <sub>2</sub> (90°) uracil tautomers in all studied environments                                                                                                                              | 3 |
| Table S11. Solvation energies of 5-NO <sub>2</sub> (90°) uracil tautomers in all studied environments                                                                                                                             | 4 |
| Table S12. Relative energies of 6-NH <sub>2</sub> uracil tautomers in all studied environments                                                                                                                                    | 4 |
| Table S13. Solvation energies of 6-NH <sub>2</sub> uracil tautomers in all studied environments                                                                                                                                   | 4 |
| Table S14. Relative Gibbs energies 6-NH <sub>2</sub> uracil tautomers in all studied environments                                                                                                                                 | 4 |
| Table S15. Solvation Gibbs energies of 6-NH <sub>2</sub> uracil tautomers in all studied environments                                                                                                                             | 4 |
| Table S16. Relative energies of 6-NO <sub>2</sub> uracil tautomers in all studied environments                                                                                                                                    | 5 |
| Table S17. Solvation energies of 6-NO <sub>2</sub> uracil tautomers in all studied environments                                                                                                                                   | 5 |
| Table S18. Relative Gibbs energies of 6-NO <sub>2</sub> uracil tautomers in all studied environments                                                                                                                              | 5 |
| Table S19. Solvation Gibbs energies of 6-NO <sub>2</sub> uracil tautomers in all studied environments                                                                                                                             | 5 |
| Table S20. Relative energies of 6-NO <sub>2</sub> (90°) uracil tautomers in all studied environments                                                                                                                              | 5 |
| Table S21. Solvation energies of 6-NO <sub>2</sub> (90°) uracil tautomers in all studied environments                                                                                                                             | 6 |
| Table S22. Values of $a$ and determination coefficients of $G = a \cdot 1/\epsilon + b$ correlations, where $G$ is the total Gibbs energy of a molecule (in hartree) and $\epsilon$ is the dielectric constant of the environment | 6 |
| Table S23. Values of $a$ and determination coefficients of $G_{\text{solv}} = a \cdot 1/\epsilon + b$ correlations                                                                                                                | 6 |
| Table S24. cSAR(X) values for the amino group in 5-NH <sub>2</sub> uracil tautomers in all studied environments                                                                                                                   | 6 |
| Table S25. cSAR(X) values for the nitro group in 5-NO <sub>2</sub> uracil tautomers in all studied environments                                                                                                                   | 6 |
| Table S26. cSAR(X) values for the nitro group in 5-NO <sub>2</sub> (90°) uracil tautomers in all studied environments                                                                                                             | 7 |
| Table S27. cSAR(X) values for the amino group in 6-NH <sub>2</sub> uracil tautomers in all studied environments                                                                                                                   | 7 |
| Table S28. cSAR(X) values for the nitro group in 6-NO <sub>2</sub> uracil tautomers in all studied environments                                                                                                                   | 7 |
| Table S29. cSAR(X) values for the nitro group in 6-NO <sub>2</sub> (90°) uracil tautomers in all studied environments                                                                                                             | 7 |
| Table S30. Geometry data in the gas phase ( <sub>g</sub> ) and formamide ( <sub>f</sub> ), obtained at B97D3/aug-cc-pVDZ level                                                                                                    | 8 |
| Table S31. Differences between CN bond lengths in formamide and the gas phase                                                                                                                                                     | 9 |
| Table S32. CO bond lengths of C=O/C-OH groups in 2 and 4 position of the uracil molecule (in the gas phase)                                                                                                                       | 9 |
| Table S33. cSAR(X) values of C=O/C-OH groups in 2 and 4 position of the uracil molecule in the gas phase                                                                                                                          | 9 |
| Table S34. Ranges and average values of cSAR(X) of C=O/C-OH groups in 2 and 4 position of the uracil molecule, in the gas phase                                                                                                   | 9 |

**Table S1.** Dipole moments  $\mu$  (in Debye) and the difference in  $\mu$  between formamide and the gas phase,  $\Delta\mu = \mu(f) - \mu(\text{gas})$ .

|           | 5-NH2 |             | 5-NO2 |             | 5-NO2(90°) |             | 6-NO2 |             | 6-NO2(90°) |             | 6-NH2 |             |
|-----------|-------|-------------|-------|-------------|------------|-------------|-------|-------------|------------|-------------|-------|-------------|
|           | $\mu$ | $\Delta\mu$ | $\mu$ | $\Delta\mu$ | $\mu$      | $\Delta\mu$ | $\mu$ | $\Delta\mu$ | $\mu$      | $\Delta\mu$ | $\mu$ | $\Delta\mu$ |
| <b>u1</b> | 4.5   | 1.9         | 4.9   | 2.5         | 4.7        | 2.0         | 0.5   | 0.5         | 1.1        | 0.8         | 6.2   | 3.2         |
| <b>u2</b> | 2.3   | 1.1         | 7.0   | 3.2         | 6.3        | 2.4         | 4.5   | 1.6         | 4.2        | 1.5         | 4.8   | 2.1         |
| <b>u3</b> | 5.9   | 2.6         | 2.2   | 1.1         | 2.3        | 1.2         | 2.8   | 1.3         | 2.6        | 1.3         | 6.6   | 3.3         |
| <b>u4</b> | 2.6   | 1.0         | 3.8   | 1.5         | 2.8        | 0.7         | 3.3   | 1.0         | 2.8        | 0.8         | 3.2   | 1.4         |
| <b>u5</b> | 3.3   | 1.3         | 4.7   | 1.7         | 3.7        | 1.0         | 5.8   | 2.0         | 5.4        | 1.7         | 1.9   | 0.9         |
| <b>u6</b> | 3.8   | 1.9         | 1.8   | 0.6         | 1.3        | 0.4         | 4.7   | 1.8         | 4.5        | 1.6         | 4.2   | 1.9         |

**Table S2.** Relative energies (in kcal·mol<sup>-1</sup>) of 5-NH2 uracil tautomers in all studied environments.

| <b>E_rel</b> | <b>gas</b> | <b>to</b> | <b>chl</b> | <b>o-cr</b> | <b>thf</b> | <b>pyr</b> | <b>et</b> | <b>dms</b> | <b>water</b> | <b>f</b> | <b>range</b> |
|--------------|------------|-----------|------------|-------------|------------|------------|-----------|------------|--------------|----------|--------------|
| <b>u1</b>    | 0.0        | 0.0       | 0.0        | 0.0         | 0.0        | 0.0        | 0.0       | 0.0        | 0.0          | 0.0      | 0.0          |
| <b>u2</b>    | 9.5        | 10.7      | 11.3       | 11.6        | 11.6       | 11.9       | 12.1      | 12.2       | 12.2         | 12.2     | 2.7          |
| <b>u3</b>    | 14.6       | 13.8      | 13.2       | 13.0        | 12.9       | 12.7       | 12.5      | 12.5       | 12.4         | 12.4     | -2.2         |
| <b>u4</b>    | 14.4       | 16.1      | 17.0       | 17.3        | 17.4       | 17.7       | 17.9      | 18.0       | 18.1         | 18.1     | 3.6          |
| <b>u5</b>    | 15.5       | 16.9      | 17.6       | 17.8        | 17.9       | 18.1       | 18.3      | 18.3       | 18.4         | 18.4     | 2.9          |
| <b>u6</b>    | 18.1       | 19.3      | 19.8       | 19.9        | 20.0       | 20.1       | 20.2      | 20.2       | 20.3         | 20.3     | 2.1          |

**Table S3.** Solvation energies (in kcal·mol<sup>-1</sup>) of 5-NH2 uracil tautomers in all studied environments.

| <b>E_solv</b> | <b>gas</b> | <b>to</b> | <b>chl</b> | <b>o-cr</b> | <b>thf</b> | <b>pyr</b> | <b>et</b> | <b>dms</b> | <b>water</b> | <b>f</b> | <b>range</b> |
|---------------|------------|-----------|------------|-------------|------------|------------|-----------|------------|--------------|----------|--------------|
| <b>u1</b>     | 0.0        | -5.0      | -7.7       | -8.7        | -8.9       | -9.8       | -10.5     | -10.8      | -11.0        | -11.1    | -11.0        |
| <b>u2</b>     | 0.0        | -3.8      | -5.8       | -6.6        | -6.7       | -7.4       | -7.9      | -8.2       | -8.3         | -8.3     | -8.3         |
| <b>u3</b>     | 0.0        | -5.9      | -9.1       | -10.3       | -10.6      | -11.7      | -12.6     | -13.0      | -13.2        | -13.3    | -13.2        |
| <b>u4</b>     | 0.0        | -3.4      | -5.1       | -5.8        | -5.9       | -6.6       | -7.0      | -7.3       | -7.4         | -7.4     | -7.4         |
| <b>u5</b>     | 0.0        | -3.7      | -5.7       | -6.4        | -6.5       | -7.3       | -7.8      | -8.0       | -8.2         | -8.2     | -8.2         |
| <b>u6</b>     | 0.0        | -3.8      | -6.0       | -6.9        | -7.0       | -7.9       | -8.4      | -8.7       | -8.9         | -9.0     | -8.9         |

**Table S4.** Relative Gibbs energies (in kcal·mol<sup>-1</sup>) of 5-NH2 uracil tautomers in all studied environments.

| <b>G_rel</b> | <b>gas</b> | <b>to</b> | <b>chl</b> | <b>o-cr</b> | <b>thf</b> | <b>pyr</b> | <b>et</b> | <b>dms</b> | <b>water</b> | <b>f</b> | <b>range</b> |
|--------------|------------|-----------|------------|-------------|------------|------------|-----------|------------|--------------|----------|--------------|
| <b>u1</b>    | 0.0        | 0.0       | 0.0        | 0.0         | 0.0        | 0.0        | 0.0       | 0.0        | 0.0          | 0.0      | 0.0          |
| <b>u2</b>    | 9.4        | 10.5      | 11.1       | 11.4        | 11.4       | 11.7       | 11.8      | 11.8       | 11.9         | 11.9     | 2.4          |
| <b>u3</b>    | 14.1       | 13.4      | 13.0       | 12.8        | 12.8       | 12.6       | 12.4      | 12.3       | 12.2         | 12.2     | -1.9         |
| <b>u4</b>    | 14.3       | 15.9      | 16.7       | 17.0        | 17.1       | 17.4       | 17.6      | 17.6       | 17.7         | 17.7     | 3.3          |
| <b>u5</b>    | 15.4       | 16.6      | 17.2       | 17.5        | 17.5       | 17.7       | 17.8      | 17.9       | 17.9         | 17.9     | 2.6          |
| <b>u6</b>    | 17.8       | 18.5      | 19.4       | 19.6        | 19.7       | 19.8       | 19.8      | 19.9       | 19.9         | 19.9     | 2.1          |

**Table S5.** Solvation Gibbs energies (in kcal·mol<sup>-1</sup>) of 5-NH2 uracil tautomers in all studied environments.

| <b>G_solv</b> | <b>gas</b> | <b>to</b> | <b>chl</b> | <b>o-cr</b> | <b>thf</b> | <b>pyr</b> | <b>et</b> | <b>dms</b> | <b>water</b> | <b>f</b> | <b>range</b> |
|---------------|------------|-----------|------------|-------------|------------|------------|-----------|------------|--------------|----------|--------------|
| <b>u1</b>     | 0.0        | -5.0      | -7.7       | -8.7        | -8.9       | -9.8       | -10.4     | -10.8      | -10.9        | -11.0    | -10.9        |
| <b>u2</b>     | 0.0        | -4.0      | -6.0       | -6.7        | -6.9       | -7.6       | -8.1      | -8.4       | -8.5         | -8.5     | -8.5         |
| <b>u3</b>     | 0.0        | -5.7      | -8.8       | -10.0       | -10.2      | -11.4      | -12.2     | -12.6      | -12.8        | -12.9    | -12.8        |
| <b>u4</b>     | 0.0        | -3.4      | -5.3       | -6.0        | -6.1       | -6.8       | -7.2      | -7.5       | -7.6         | -7.6     | -7.6         |
| <b>u5</b>     | 0.0        | -3.8      | -5.8       | -6.6        | -6.7       | -7.4       | -8.0      | -8.2       | -8.4         | -8.4     | -8.4         |
| <b>u6</b>     | 0.0        | -4.3      | -6.1       | -6.8        | -7.0       | -7.8       | -8.4      | -8.7       | -8.8         | -8.9     | -8.8         |

**Table S6.** Relative energies (in kcal·mol<sup>-1</sup>) of 5-NO<sub>2</sub> uracil tautomers in all studied environments.

| <b>E<sub>rel</sub></b> | <b>gas</b> | <b>to</b> | <b>chl</b> | <b>o-cr</b> | <b>thf</b> | <b>pyr</b> | <b>et</b> | <b>dms</b> | <b>water</b> | <b>f</b> | <b>range</b> |
|------------------------|------------|-----------|------------|-------------|------------|------------|-----------|------------|--------------|----------|--------------|
| <b>u1</b>              | 0.0        | 0.0       | 0.0        | 0.0         | 0.0        | 0.0        | 0.0       | 0.0        | 0.0          | 0.0      | 0.0          |
| <b>u2</b>              | 10.1       | 11.0      | 11.5       | 11.7        | 11.8       | 11.9       | 12.0      | 12.1       | 12.1         | 12.1     | 2.1          |
| <b>u3</b>              | 10.2       | 10.6      | 10.9       | 11.0        | 11.0       | 11.1       | 11.2      | 11.2       | 11.2         | 11.2     | 1.1          |
| <b>u4</b>              | 11.8       | 14.4      | 15.8       | 16.3        | 16.4       | 17.0       | 17.4      | 17.6       | 17.7         | 17.7     | 5.9          |
| <b>u5</b>              | 12.9       | 15.1      | 16.4       | 16.8        | 16.9       | 17.4       | 17.7      | 17.8       | 17.9         | 17.9     | 5.0          |
| <b>u6</b>              | 5.4        | 8.7       | 10.5       | 11.1        | 11.2       | 11.9       | 12.3      | 12.6       | 12.7         | 12.7     | 7.3          |

**Table S7.** Solvation energies (in kcal·mol<sup>-1</sup>) of 5-NO<sub>2</sub> uracil tautomers in all studied environments.

| <b>E<sub>solv</sub></b> | <b>gas</b> | <b>to</b> | <b>chl</b> | <b>o-cr</b> | <b>thf</b> | <b>pyr</b> | <b>et</b> | <b>dms</b> | <b>water</b> | <b>f</b> | <b>range</b> |
|-------------------------|------------|-----------|------------|-------------|------------|------------|-----------|------------|--------------|----------|--------------|
| <b>u1</b>               | 0.0        | -6.4      | -9.9       | -11.2       | -11.4      | -12.7      | -13.6     | -14.1      | -14.3        | -14.4    | -14.3        |
| <b>u2</b>               | 0.0        | -5.5      | -8.5       | -9.6        | -9.7       | -10.9      | -11.7     | -12.1      | -12.3        | -12.3    | -12.3        |
| <b>u3</b>               | 0.0        | -5.9      | -9.2       | -10.4       | -10.6      | -11.8      | -12.6     | -13.1      | -13.3        | -13.4    | -13.3        |
| <b>u4</b>               | 0.0        | -3.8      | -5.9       | -6.6        | -6.8       | -7.5       | -8.0      | -8.3       | -8.4         | -8.5     | -8.4         |
| <b>u5</b>               | 0.0        | -4.1      | -6.4       | -7.3        | -7.4       | -8.3       | -8.8      | -9.2       | -9.3         | -9.4     | -9.3         |
| <b>u6</b>               | 0.0        | -3.1      | -4.8       | -5.5        | -5.6       | -6.2       | -6.7      | -6.9       | -7.0         | -7.1     | -7.0         |

**Table S8.** Relative Gibbs energies (in kcal·mol<sup>-1</sup>) of 5-NO<sub>2</sub> uracil tautomers in all studied environments.

| <b>G<sub>rel</sub></b> | <b>gas</b> | <b>to</b> | <b>chl</b> | <b>o-cr</b> | <b>thf</b> | <b>pyr</b> | <b>et</b> | <b>dms</b> | <b>water</b> | <b>f</b> | <b>range</b> |
|------------------------|------------|-----------|------------|-------------|------------|------------|-----------|------------|--------------|----------|--------------|
| <b>u1</b>              | 0.0        | 0.0       | 0.0        | 0.0         | 0.0        | 0.0        | 0.0       | 0.0        | 0.0          | 0.0      | 0.0          |
| <b>u2</b>              | 10.0       | 10.6      | 11.2       | 11.4        | 11.6       | 11.7       | 11.8      | 11.9       | 12.0         | 12.0     | 2.0          |
| <b>u3</b>              | 9.9        | 10.3      | 10.6       | 10.7        | 11.3       | 10.9       | 11.0      | 11.1       | 11.1         | 11.1     | 1.4          |
| <b>u4</b>              | 11.5       | 13.6      | 15.2       | 15.8        | 16.5       | 16.5       | 17.0      | 17.2       | 17.3         | 17.4     | 5.8          |
| <b>u5</b>              | 12.7       | 14.3      | 15.7       | 16.2        | 16.9       | 16.9       | 17.2      | 17.4       | 17.5         | 17.6     | 4.8          |
| <b>u6</b>              | 6.4        | 9.3       | 11.0       | 11.6        | 12.3       | 12.4       | 12.9      | 13.1       | 13.3         | 13.3     | 6.9          |

**Table S9.** Solvation Gibbs energies (in kcal·mol<sup>-1</sup>) of 5-NO<sub>2</sub> uracil tautomers in all studied environments.

| <b>G<sub>solv</sub></b> | <b>gas</b> | <b>to</b> | <b>chl</b> | <b>o-cr</b> | <b>thf</b> | <b>pyr</b> | <b>et</b> | <b>dms</b> | <b>water</b> | <b>f</b> | <b>range</b> |
|-------------------------|------------|-----------|------------|-------------|------------|------------|-----------|------------|--------------|----------|--------------|
| <b>u1</b>               | 0.0        | -6.2      | -9.6       | -10.9       | -11.7      | -12.5      | -13.4     | -13.9      | -14.2        | -14.3    | 14.3         |
| <b>u2</b>               | 0.0        | -5.6      | -8.4       | -9.5        | -10.2      | -10.8      | -11.6     | -12.0      | -12.2        | -12.3    | 12.3         |
| <b>u3</b>               | 0.0        | -5.8      | -9.0       | -10.1       | -10.4      | -11.5      | -12.4     | -12.8      | -13.0        | -13.1    | 13.1         |
| <b>u4</b>               | 0.0        | -4.1      | -5.9       | -6.6        | -6.8       | -7.5       | -8.0      | -8.3       | -8.4         | -8.4     | 8.4          |
| <b>u5</b>               | 0.0        | -4.6      | -6.6       | -7.4        | -7.6       | -8.4       | -8.9      | -9.2       | -9.4         | -9.4     | 9.4          |
| <b>u6</b>               | 0.0        | -3.2      | -5.0       | -5.7        | -5.8       | -6.5       | -6.9      | -7.2       | -7.3         | -7.3     | 7.3          |

**Table S10.** Relative energies (in kcal·mol<sup>-1</sup>) of 5-NO<sub>2</sub>(90°) uracil tautomers in all studied environments.

| <b>E<sub>rel</sub></b> | <b>gas</b> | <b>thf</b> | <b>water</b> | <b>range</b> |
|------------------------|------------|------------|--------------|--------------|
| <b>u1</b>              | 0.0        | 0.0        | 0.0          | 0.0          |
| <b>u2</b>              | 9.1        | 11.0       | 11.6         | 2.5          |
| <b>u3</b>              | 11.8       | 12.0       | 12.0         | 0.2          |
| <b>u4</b>              | 11.6       | 16.0       | 17.1         | 5.6          |
| <b>u5</b>              | 12.6       | 16.5       | 17.4         | 4.8          |
| <b>u6</b>              | 15.8       | 19.7       | 20.6         | 4.8          |

**Table S11.** Solvation energies (in kcal·mol<sup>-1</sup>) of 5-NO<sub>2</sub>(90°) uracil tautomers in all studied environments.

| E_solv | gas | thf   | water | range |
|--------|-----|-------|-------|-------|
| u1     | 0.0 | -10.6 | -13.2 | 13.2  |
| u2     | 0.0 | -8.7  | -10.7 | 10.7  |
| u3     | 0.0 | -10.4 | -13.0 | 13.0  |
| u4     | 0.0 | -6.2  | -7.6  | 7.6   |
| u5     | 0.0 | -6.8  | -8.4  | 8.4   |
| u6     | 0.0 | -6.7  | -8.4  | 8.4   |

**Table S12.** Relative energies (in kcal·mol<sup>-1</sup>) of 6-NH<sub>2</sub> uracil tautomers in all studied environments.

| E_rel | gas  | to   | chl  | o-cr | thf  | pyr  | et   | dmso | water | f    | range |
|-------|------|------|------|------|------|------|------|------|-------|------|-------|
| u1    | 0.0  | 0.0  | 0.0  | 0.0  | 0.0  | 0.0  | 0.0  | 0.0  | 0.0   | 0.0  | 0.0   |
| u2    | 6.6  | 8.3  | 9.3  | 9.6  | 9.7  | 10.0 | 10.3 | 10.4 | 10.5  | 10.5 | 3.8   |
| u3    | 10.3 | 10.2 | 10.0 | 9.9  | 9.9  | 9.8  | 9.7  | 9.7  | 9.7   | 9.7  | -0.6  |
| u4    | 8.1  | 11.1 | 12.7 | 13.3 | 13.4 | 14.0 | 14.4 | 14.6 | 14.7  | 14.7 | 6.5   |
| u5    | 8.5  | 11.4 | 12.9 | 13.5 | 13.6 | 14.2 | 14.5 | 14.7 | 14.8  | 14.9 | 6.4   |
| u6    | 12.4 | 14.4 | 15.3 | 15.6 | 15.6 | 15.9 | 16.1 | 16.2 | 16.3  | 16.3 | 3.9   |

**Table S13.** Solvation energies (in kcal·mol<sup>-1</sup>) of 6-NH<sub>2</sub> uracil tautomers in all studied environments.

| E_solv | gas | to   | chl   | o-cr  | thf   | pyr   | et    | dmso  | water | f     | range |
|--------|-----|------|-------|-------|-------|-------|-------|-------|-------|-------|-------|
| u1     | 0.0 | -6.5 | -9.9  | -11.2 | -11.4 | -12.7 | -13.5 | -14.0 | -14.2 | -14.2 | -14.2 |
| u2     | 0.0 | -4.8 | -7.3  | -8.2  | -8.4  | -9.3  | -9.9  | -10.2 | -10.3 | -10.4 | -10.3 |
| u3     | 0.0 | -6.7 | -10.3 | -11.6 | -11.9 | -13.2 | -14.1 | -14.6 | -14.8 | -14.9 | -14.8 |
| u4     | 0.0 | -3.5 | -5.4  | -6.0  | -6.2  | -6.8  | -7.3  | -7.5  | -7.6  | -7.7  | -7.6  |
| u5     | 0.0 | -3.6 | -5.5  | -6.1  | -6.3  | -7.0  | -7.4  | -7.7  | -7.8  | -7.9  | -7.8  |
| u6     | 0.0 | -4.6 | -7.1  | -8.0  | -8.2  | -9.2  | -9.8  | -10.1 | -10.3 | -10.4 | -10.3 |

**Table S14.** Relative Gibbs energies (in kcal·mol<sup>-1</sup>) of 6-NH<sub>2</sub> uracil tautomers in all studied environments.

| G_rel | gas  | to   | chl  | o-cr | thf  | pyr  | et   | dmso | water | f    | range |
|-------|------|------|------|------|------|------|------|------|-------|------|-------|
| u1    | 0.0  | 0.0  | 0.0  | 0.0  | 0.0  | 0.0  | 0.0  | 0.0  | 0.0   | 0.0  | 0.0   |
| u2    | 6.6  | 8.1  | 9.2  | 9.5  | 9.6  | 9.9  | 10.1 | 10.3 | 10.4  | 10.4 | 3.8   |
| u3    | 10.1 | 9.9  | 9.8  | 9.7  | 9.7  | 9.5  | 9.4  | 9.4  | 9.3   | 9.3  | 0.8   |
| u4    | 8.4  | 11.1 | 12.8 | 13.3 | 13.4 | 13.9 | 14.3 | 14.5 | 14.6  | 14.7 | 6.2   |
| u5    | 8.7  | 11.4 | 13.0 | 13.5 | 13.6 | 14.1 | 14.5 | 14.7 | 14.8  | 14.8 | 6.2   |
| u6    | 12.5 | 14.4 | 15.4 | 15.6 | 15.7 | 15.9 | 16.1 | 16.2 | 16.2  | 16.2 | 3.7   |

**Table S15.** Solvation Gibbs energies (in kcal·mol<sup>-1</sup>) of 6-NH<sub>2</sub> uracil tautomers in all studied environments.

| G_solv | gas | to   | chl   | o-cr  | thf   | pyr   | et    | dmso  | water | f     | range |
|--------|-----|------|-------|-------|-------|-------|-------|-------|-------|-------|-------|
| u1     | 0.0 | -6.5 | -10.1 | -11.3 | -11.6 | -12.8 | -13.7 | -14.2 | -14.4 | -14.5 | 14.5  |
| u2     | 0.0 | -5.0 | -7.5  | -8.5  | -8.7  | -9.6  | -10.2 | -10.5 | -10.6 | -10.7 | 10.7  |
| u3     | 0.0 | -6.7 | -10.4 | -11.7 | -12.0 | -13.4 | -14.4 | -14.9 | -15.2 | -15.3 | 15.3  |
| u4     | 0.0 | -3.8 | -5.8  | -6.5  | -6.6  | -7.3  | -7.8  | -8.1  | -8.2  | -8.2  | 8.2   |
| u5     | 0.0 | -3.8 | -5.8  | -6.5  | -6.7  | -7.4  | -7.9  | -8.1  | -8.3  | -8.3  | 8.3   |
| u6     | 0.0 | -4.6 | -7.2  | -8.2  | -8.4  | -9.4  | -10.1 | -10.5 | -10.7 | -10.7 | 10.7  |

**Table S16.** Relative energies (in kcal·mol<sup>-1</sup>) of 6-NO<sub>2</sub> uracil tautomers in all studied environments.

| <b>E_rel</b> | <b>gas</b> | <b>to</b> | <b>chl</b> | <b>o-cr</b> | <b>thf</b> | <b>pyr</b> | <b>et</b> | <b>dmso</b> | <b>water</b> | <b>f</b> | <b>range</b> |
|--------------|------------|-----------|------------|-------------|------------|------------|-----------|-------------|--------------|----------|--------------|
| <b>u1</b>    | 0.0        | 0.0       | 0.0        | 0.0         | 0.0        | 0.0        | 0.0       | 0.0         | 0.0          | 0.0      | 0.0          |
| <b>u2</b>    | 9.9        | 9.3       | 9.1        | 9.0         | 9.0        | 8.9        | 8.8       | 8.8         | 8.8          | 8.8      | 1.1          |
| <b>u3</b>    | 11.4       | 11.3      | 11.2       | 11.2        | 11.1       | 11.1       | 11.0      | 11.0        | 11.0         | 11.0     | 0.4          |
| <b>u4</b>    | 11.7       | 12.4      | 12.8       | 13.0        | 13.0       | 13.2       | 13.3      | 13.3        | 13.3         | 13.3     | 1.6          |
| <b>u5</b>    | 12.9       | 13.3      | 13.4       | 13.4        | 13.4       | 13.4       | 13.4      | 13.4        | 13.4         | 13.4     | 0.5          |
| <b>u6</b>    | 16.2       | 15.9      | 15.5       | 15.4        | 15.4       | 15.2       | 15.1      | 15.0        | 15.0         | 15.0     | 1.3          |

**Table S17.** Solvation energies (in kcal·mol<sup>-1</sup>) of 6-NO<sub>2</sub> uracil tautomers in all studied environments.

| <b>E_solv</b> | <b>gas</b> | <b>to</b> | <b>chl</b> | <b>o-cr</b> | <b>thf</b> | <b>pyr</b> | <b>et</b> | <b>dmso</b> | <b>water</b> | <b>f</b> | <b>range</b> |
|---------------|------------|-----------|------------|-------------|------------|------------|-----------|-------------|--------------|----------|--------------|
| <b>u1</b>     | 0.0        | -4.3      | -6.5       | -7.4        | -7.5       | -8.3       | -8.9      | -9.2        | -9.3         | -9.4     | 9.4          |
| <b>u2</b>     | 0.0        | -4.9      | -7.4       | -8.3        | -8.5       | -9.3       | -9.9      | -10.3       | -10.4        | -10.5    | 10.5         |
| <b>u3</b>     | 0.0        | -4.4      | -6.8       | -7.6        | -7.8       | -8.7       | -9.3      | -9.6        | -9.7         | -9.8     | 9.8          |
| <b>u4</b>     | 0.0        | -3.6      | -5.4       | -6.1        | -6.2       | -6.9       | -7.4      | -7.6        | -7.7         | -7.8     | 7.8          |
| <b>u5</b>     | 0.0        | -4.0      | -6.1       | -6.9        | -7.1       | -7.9       | -8.4      | -8.7        | -8.8         | -8.9     | 8.9          |
| <b>u6</b>     | 0.0        | -4.6      | -7.2       | -8.2        | -8.4       | -9.4       | -10.0     | -10.4       | -10.6        | -10.6    | 10.6         |

**Table S18.** Relative Gibbs energies (in kcal·mol<sup>-1</sup>) of 6-NO<sub>2</sub> uracil tautomers in all studied environments.

| <b>G_rel</b> | <b>gas</b> | <b>to</b> | <b>chl</b> | <b>o-cr</b> | <b>thf</b> | <b>pyr</b> | <b>et</b> | <b>dmso</b> | <b>water</b> | <b>f</b> | <b>range</b> |
|--------------|------------|-----------|------------|-------------|------------|------------|-----------|-------------|--------------|----------|--------------|
| <b>u1</b>    | 0.0        | 0.0       | 0.0        | 0.0         | 0.0        | 0.0        | 0.0       | 0.0         | 0.0          | 0.0      | 0.0          |
| <b>u2</b>    | 9.2        | 8.9       | 8.6        | 8.6         | 8.5        | 8.5        | 8.4       | 8.4         | 8.4          | 8.4      | 0.8          |
| <b>u3</b>    | 11.2       | 11.1      | 11.0       | 10.9        | 10.9       | 10.9       | 10.9      | 10.8        | 10.8         | 10.8     | 0.3          |
| <b>u4</b>    | 11.3       | 12.2      | 12.6       | 12.7        | 12.8       | 12.9       | 13.0      | 13.0        | 13.1         | 13.1     | 1.7          |
| <b>u5</b>    | 12.3       | 12.9      | 13.0       | 13.1        | 13.1       | 13.1       | 13.1      | 13.1        | 13.1         | 13.1     | 0.8          |
| <b>u6</b>    | 15.7       | 15.3      | 15.0       | 14.9        | 14.8       | 14.7       | 14.7      | 14.7        | 14.7         | 14.6     | 1.0          |

**Table S19.** Solvation Gibbs energies (in kcal·mol<sup>-1</sup>) of 6-NO<sub>2</sub> uracil tautomers in all studied environments.

| <b>G_solv</b> | <b>gas</b> | <b>to</b> | <b>chl</b> | <b>o-cr</b> | <b>thf</b> | <b>pyr</b> | <b>et</b> | <b>dmso</b> | <b>water</b> | <b>f</b> | <b>range</b> |
|---------------|------------|-----------|------------|-------------|------------|------------|-----------|-------------|--------------|----------|--------------|
| <b>u1</b>     | 0.0        | -4.3      | -6.6       | -7.4        | -7.6       | -8.4       | -9.0      | -9.3        | -9.5         | -9.6     | 9.6          |
| <b>u2</b>     | 0.0        | -4.6      | -7.2       | -8.1        | -8.3       | -9.2       | -9.8      | -10.2       | -10.3        | -10.4    | 10.4         |
| <b>u3</b>     | 0.0        | -4.4      | -6.8       | -7.6        | -7.8       | -8.7       | -9.3      | -9.7        | -9.8         | -9.9     | 9.9          |
| <b>u4</b>     | 0.0        | -3.4      | -5.3       | -6.0        | -6.2       | -6.9       | -7.4      | -7.6        | -7.8         | -7.8     | 7.8          |
| <b>u5</b>     | 0.0        | -3.6      | -5.8       | -6.6        | -6.8       | -7.6       | -8.2      | -8.5        | -8.7         | -8.7     | 8.7          |
| <b>u6</b>     | 0.0        | -4.7      | -7.3       | -8.2        | -8.4       | -9.4       | -10.0     | -10.4       | -10.5        | -10.6    | 10.6         |

**Table S20.** Relative energies (in kcal·mol<sup>-1</sup>) of 6-NO<sub>2</sub>(90°) uracil tautomers in all studied environments.

| <b>E_rel</b> | <b>gas</b> | <b>thf</b> | <b>water</b> | <b>range</b> |
|--------------|------------|------------|--------------|--------------|
| <b>u1</b>    | 0.0        | 0.0        | 0.0          | 0.0          |
| <b>u2</b>    | 5.4        | 5.8        | 6.0          | 0.6          |
| <b>u3</b>    | 11.1       | 11.0       | 10.9         | 0.2          |
| <b>u4</b>    | 7.2        | 9.9        | 10.6         | 3.4          |
| <b>u5</b>    | 8.1        | 10.1       | 10.6         | 2.5          |
| <b>u6</b>    | 11.7       | 12.2       | 12.2         | 0.5          |

**Table S21.** Solvation energies (in kcal·mol<sup>-1</sup>) of 6-NO<sub>2</sub>(90°) uracil tautomers in all studied environments.

| <b>E_solv</b> | <b>gas</b> | <b>thf</b> | <b>water</b> | <b>range</b> |
|---------------|------------|------------|--------------|--------------|
| <b>u1</b>     | 0.0        | -8.5       | -10.5        | 10.5         |
| <b>u2</b>     | 0.0        | -8.0       | -9.9         | 9.9          |
| <b>u3</b>     | 0.0        | -8.6       | -10.7        | 10.7         |
| <b>u4</b>     | 0.0        | -5.8       | -7.1         | 7.1          |
| <b>u5</b>     | 0.0        | -6.4       | -8.0         | 8.0          |
| <b>u6</b>     | 0.0        | -8.0       | -10.0        | 10.0         |

**Table S22.** Values of  $a$  and determination coefficients of  $G = a \cdot 1/\epsilon + b$  correlations, where  $G$  is the total Gibbs energy of a molecule (in hartree) and  $\epsilon$  is the dielectric constant of the environment.

|           | <b>5-NH2</b> |       | <b>5-NO2</b> |       | <b>6-NO2</b> |       | <b>6-NH2</b> |       |
|-----------|--------------|-------|--------------|-------|--------------|-------|--------------|-------|
|           | $a$          | $R^2$ | $a$          | $R^2$ | $a$          | $R^2$ | $a$          | $R^2$ |
| <b>u1</b> | 0.0178       | 0.980 | 0.0232       | 0.971 | 0.0155       | 0.975 | 0.0235       | 0.977 |
| <b>u2</b> | 0.0138       | 0.981 | 0.0199       | 0.976 | 0.0169       | 0.975 | 0.0174       | 0.981 |
| <b>u3</b> | 0.0209       | 0.973 | 0.0212       | 0.973 | 0.0160       | 0.973 | 0.0247       | 0.972 |
| <b>u4</b> | 0.0124       | 0.976 | 0.0136       | 0.984 | 0.0127       | 0.971 | 0.0134       | 0.979 |
| <b>u5</b> | 0.0136       | 0.977 | 0.0152       | 0.985 | 0.0142       | 0.963 | 0.0135       | 0.978 |
| <b>u6</b> | 0.0142       | 0.978 | 0.0119       | 0.973 | 0.0172       | 0.974 | 0.0174       | 0.968 |

**Table S23.** Values of  $a$  and determination coefficients of  $G_{\text{solv}}(\text{kcal} \cdot \text{mol}^{-1}) = a \cdot 1/\epsilon + b$  correlations.

|           | <b>5-NH2</b> |        | <b>5-NO2</b> |        | <b>6-NO2</b> |        | <b>6-NH2</b> |        |
|-----------|--------------|--------|--------------|--------|--------------|--------|--------------|--------|
|           | $a$          | $R^2$  | $a$          | $R^2$  | $a$          | $R^2$  | $a$          | $R^2$  |
| <b>u1</b> | 11.1942      | 0.9796 | 14.5484      | 0.9713 | 9.7176       | 0.9753 | 14.7345      | 0.9771 |
| <b>u2</b> | 8.6785       | 0.9807 | 12.4949      | 0.9763 | 10.5896      | 0.9746 | 10.8955      | 0.9809 |
| <b>u3</b> | 13.1180      | 0.9735 | 13.3143      | 0.9732 | 10.0560      | 0.9728 | 15.5109      | 0.9718 |
| <b>u4</b> | 7.7720       | 0.9765 | 8.5240       | 0.9839 | 7.9690       | 0.9708 | 8.3812       | 0.9793 |
| <b>u5</b> | 8.5509       | 0.9768 | 9.5250       | 0.9847 | 8.9034       | 0.9628 | 8.4624       | 0.9779 |
| <b>u6</b> | 8.9180       | 0.9783 | 7.4651       | 0.9727 | 10.7867      | 0.9745 | 10.9279      | 0.9677 |

**Table S24.** cSAR(X) values for the amino group in 5-NH<sub>2</sub> uracil tautomers in all studied environments.

| <b>tautomer</b> | <b>gas</b> | <b>to</b> | <b>chl</b> | <b>o-cr</b> | <b>thf</b> | <b>pyr</b> | <b>et</b> | <b>dmso</b> | <b>water</b> | <b>f</b> |
|-----------------|------------|-----------|------------|-------------|------------|------------|-----------|-------------|--------------|----------|
| <b>u1</b>       | 0.067      | 0.073     | 0.076      | 0.076       | 0.076      | 0.077      | 0.078     | 0.078       | 0.078        | 0.078    |
| <b>u2</b>       | 0.078      | 0.081     | 0.082      | 0.082       | 0.082      | 0.082      | 0.082     | 0.082       | 0.081        | 0.081    |
| <b>u3</b>       | 0.057      | 0.072     | 0.080      | 0.083       | 0.083      | 0.086      | 0.088     | 0.089       | 0.089        | 0.089    |
| <b>u4</b>       | 0.068      | 0.080     | 0.086      | 0.088       | 0.089      | 0.091      | 0.092     | 0.093       | 0.093        | 0.093    |
| <b>u5</b>       | 0.068      | 0.079     | 0.085      | 0.088       | 0.088      | 0.090      | 0.092     | 0.092       | 0.093        | 0.093    |
| <b>u6</b>       | 0.042      | 0.067     | 0.080      | 0.085       | 0.086      | 0.091      | 0.094     | 0.096       | 0.097        | 0.097    |

**Table S25.** cSAR(X) values for the nitro group in 5-NO<sub>2</sub> uracil tautomers in all studied environments.

| <b>tautomer</b> | <b>gas</b> | <b>to</b> | <b>chl</b> | <b>o-cr</b> | <b>thf</b> | <b>pyr</b> | <b>et</b> | <b>dmso</b> | <b>water</b> | <b>f</b> |
|-----------------|------------|-----------|------------|-------------|------------|------------|-----------|-------------|--------------|----------|
| <b>u1</b>       | -0.163     | -0.193    | -0.210     | -0.217      | -0.218     | -0.225     | -0.229    | -0.232      | -0.233       | -0.234   |
| <b>u2</b>       | -0.166     | -0.202    | -0.222     | -0.230      | -0.234     | -0.239     | -0.244    | -0.247      | -0.249       | -0.249   |
| <b>u3</b>       | -0.180     | -0.202    | -0.213     | -0.217      | -0.218     | -0.222     | -0.225    | -0.226      | -0.227       | -0.227   |
| <b>u4</b>       | -0.173     | -0.197    | -0.210     | -0.215      | -0.216     | -0.221     | -0.225    | -0.226      | -0.227       | -0.228   |
| <b>u5</b>       | -0.172     | -0.198    | -0.211     | -0.216      | -0.217     | -0.222     | -0.225    | -0.227      | -0.228       | -0.228   |
| <b>u6</b>       | -0.136     | -0.144    | -0.149     | -0.150      | -0.150     | -0.152     | -0.153    | -0.153      | -0.153       | -0.153   |

**Table S26.** cSAR(X) values for the nitro group in 5-NO<sub>2</sub>(90°) uracil tautomers in all studied environments.

| tautomer  | gas    | thf    | water  | range  |
|-----------|--------|--------|--------|--------|
| <b>u1</b> | -0.121 | -0.157 | -0.166 | -0.045 |
| <b>u2</b> | -0.127 | -0.170 | -0.180 | -0.053 |
| <b>u3</b> | -0.136 | -0.158 | -0.162 | -0.026 |
| <b>u4</b> | -0.138 | -0.169 | -0.175 | -0.037 |
| <b>u5</b> | -0.139 | -0.169 | -0.175 | -0.037 |
| <b>u6</b> | -0.157 | -0.167 | -0.167 | -0.009 |

**Table S27.** cSAR(X) values for the amino group in 6-NH<sub>2</sub> uracil tautomers in all studied environments.

|           | gas   | to    | chl   | o-cr  | thf   | pyr   | et    | dms   | water | f     |
|-----------|-------|-------|-------|-------|-------|-------|-------|-------|-------|-------|
| <b>u1</b> | 0.215 | 0.258 | 0.283 | 0.293 | 0.295 | 0.305 | 0.312 | 0.316 | 0.317 | 0.318 |
| <b>u2</b> | 0.201 | 0.224 | 0.237 | 0.242 | 0.243 | 0.248 | 0.251 | 0.253 | 0.254 | 0.254 |
| <b>u3</b> | 0.234 | 0.277 | 0.302 | 0.312 | 0.314 | 0.324 | 0.331 | 0.335 | 0.337 | 0.338 |
| <b>u4</b> | 0.206 | 0.227 | 0.239 | 0.243 | 0.244 | 0.249 | 0.252 | 0.253 | 0.254 | 0.254 |
| <b>u5</b> | 0.214 | 0.232 | 0.241 | 0.245 | 0.245 | 0.248 | 0.250 | 0.252 | 0.252 | 0.252 |
| <b>u6</b> | 0.208 | 0.229 | 0.240 | 0.244 | 0.245 | 0.249 | 0.252 | 0.253 | 0.254 | 0.254 |

**Table S28.** cSAR(X) values for the nitro group in 6-NO<sub>2</sub> uracil tautomers in all studied environments.

|           | gas    | to     | chl    | o-cr   | thf    | pyr    | et     | dms    | water  | f      |
|-----------|--------|--------|--------|--------|--------|--------|--------|--------|--------|--------|
| <b>u1</b> | -0.001 | 0.000  | 0.000  | 0.001  | 0.001  | 0.001  | 0.001  | 0.002  | 0.002  | 0.002  |
| <b>u2</b> | -0.052 | -0.069 | -0.078 | -0.081 | -0.081 | -0.084 | -0.086 | -0.087 | -0.087 | -0.088 |
| <b>u3</b> | 0.004  | 0.004  | 0.005  | 0.005  | 0.005  | 0.006  | 0.006  | 0.006  | 0.006  | 0.006  |
| <b>u4</b> | -0.042 | -0.060 | -0.068 | -0.071 | -0.072 | -0.074 | -0.076 | -0.077 | -0.078 | -0.078 |
| <b>u5</b> | -0.035 | -0.056 | -0.066 | -0.070 | -0.071 | -0.075 | -0.077 | -0.079 | -0.079 | -0.080 |
| <b>u6</b> | -0.036 | -0.055 | -0.065 | -0.068 | -0.069 | -0.072 | -0.074 | -0.076 | -0.076 | -0.076 |

**Table S29.** cSAR(X) values for the nitro group in 6-NO<sub>2</sub>(90°) uracil tautomers in all studied environments.

|           | gas    | thf    | water  |
|-----------|--------|--------|--------|
| <b>u1</b> | 0.001  | 0.002  | 0.004  |
| <b>u2</b> | -0.030 | -0.059 | -0.065 |
| <b>u3</b> | 0.013  | 0.015  | 0.017  |
| <b>u4</b> | -0.021 | -0.049 | -0.055 |
| <b>u5</b> | -0.015 | -0.049 | -0.057 |
| <b>u6</b> | -0.018 | -0.049 | -0.055 |

**Table S30.** Geometry data in the gas phase (\_g) and formamide (\_f), obtained at B97D3/aug-cc-pVDZ level (all distances in Å). In ortho1 and ortho2 columns the lengths of the closest *ortho* contacts of H or O atoms of NH<sub>2</sub> or NO<sub>2</sub> substituents are given. Ortho1 contact is in the direction of lower atom indexing in the uracil (for example 4 for the 5 substitution), while ortho2 higher (6 for the 5 substitution). dNH1 and dNO1 is the appropriate NH or NO bond length.

|             | 5-NH2       |        |        |        |        | 5-NO2  |             |        |        |        |
|-------------|-------------|--------|--------|--------|--------|--------|-------------|--------|--------|--------|
|             | dCN         | dNH1   | dNH2   | ortho1 | ortho2 | dCN    | dNO1        | dNO2   | ortho1 | ortho2 |
| <b>u1_g</b> | 1.3969      | 1.0188 | 1.0149 | 2.3202 | 2.6802 | 1.4671 | 1.2280      | 1.2418 | 2.8197 | 2.3662 |
| <b>u2_g</b> | 1.3920      | 1.0149 | 1.0141 | 2.3792 | 2.6025 | 1.4674 | 1.2305      | 1.2395 | 2.8636 | 2.4459 |
| <b>u3_g</b> | 1.4079      | 1.0165 | 1.0166 | 2.3723 | 2.6111 | 1.4639 | 1.2307      | 1.2416 | 2.6874 | 2.3402 |
| <b>u4_g</b> | 1.4028      | 1.0160 | 1.0161 | 2.4429 | 2.5406 | 1.4666 | 1.2325      | 1.2389 | 2.6986 | 2.3849 |
| <b>u5_g</b> | 1.4030      | 1.0160 | 1.0161 | 2.4525 | 2.5294 | 1.4661 | 1.2330      | 1.2384 | 2.7022 | 2.3965 |
| <b>u6_g</b> | 1.4405      | 1.0202 | 1.0202 | 2.1013 | 2.9164 | 1.4406 | 1.2633      | 1.2293 | 1.6700 | 2.4633 |
| <b>u1_f</b> | 1.3989      | 1.0181 | 1.0163 | 2.4131 | 2.5979 | 1.4512 | 1.2364      | 1.2440 | 2.7988 | 2.3795 |
| <b>u2_f</b> | 1.3953      | 1.0175 | 1.0159 | 2.4440 | 2.5453 | 1.4509 | 1.2383      | 1.2442 | 2.8147 | 2.3957 |
| <b>u3_f</b> | 1.4041      | 1.0174 | 1.0173 | 2.4444 | 2.5518 | 1.4510 | 1.2370      | 1.2435 | 2.6767 | 2.3698 |
| <b>u4_f</b> | 1.4000      | 1.0167 | 1.0169 | 2.4701 | 2.5079 | 1.4535 | 1.2379      | 1.2425 | 2.6787 | 2.3750 |
| <b>u5_f</b> | 1.4002      | 1.0167 | 1.0169 | 2.4751 | 2.5021 | 1.4531 | 1.2380      | 1.2425 | 2.6807 | 2.3735 |
| <b>u6_f</b> | 1.4217      | 1.0223 | 1.0189 | 2.2289 | 2.5045 | 1.4342 | 1.2632      | 1.2328 | 1.6839 | 2.4658 |
|             | 5-NO2 (90°) |        |        |        |        | 6-NH2  |             |        |        |        |
|             | dCN         | dNO1   | dNO2   | ortho1 | ortho2 | dCN    | dNH1        | dNH2   | ortho1 | ortho2 |
| <b>u1_g</b> | 1.4783      | 1.2297 | 1.2297 | 2.8990 | 3.2812 | 1.3857 | 1.0143      | 1.0161 | 2.4712 | 2.3787 |
| <b>u2_g</b> | 1.4782      | 1.2303 | 1.2302 | 2.9204 | 3.2542 | 1.3748 | 1.0113      | 1.0125 | 2.5173 | 2.4269 |
| <b>u3_g</b> | 1.4794      | 1.2308 | 1.2309 | 2.8152 | 3.3150 | 1.3789 | 1.0134      | 1.0142 | 2.5118 | 2.3733 |
| <b>u4_g</b> | 1.4767      | 1.2315 | 1.2315 | 2.8422 | 3.2865 | 1.3742 | 1.0114      | 1.0129 | 2.5434 | 2.4508 |
| <b>u5_g</b> | 1.4765      | 1.2316 | 1.2316 | 2.8417 | 3.2838 | 1.3723 | 1.0110      | 1.0128 | 2.5459 | 2.4405 |
| <b>u6_g</b> | 1.4749      | 1.2350 | 1.2345 | 2.8676 | 3.3045 | 1.3739 | 1.0112      | 1.0132 | 2.5326 | 2.4377 |
| <b>u1_f</b> | 1.4754      |        |        |        |        | 1.3610 | 1.0123      | 1.0127 | 2.4898 | 2.3174 |
| <b>u2_f</b> | 1.4747      |        |        |        |        | 1.3633 | 1.0115      | 1.0123 | 2.5064 | 2.4492 |
| <b>u3_f</b> | 1.4771      |        |        |        |        | 1.3546 | 1.0116      | 1.0120 | 2.5306 | 2.3481 |
| <b>u4_f</b> | 1.4737      |        |        |        |        | 1.3635 | 1.0116      | 1.0125 | 2.5269 | 2.4769 |
| <b>u5_f</b> | 1.4735      |        |        |        |        | 1.3637 | 1.0115      | 1.0125 | 2.5223 | 2.4734 |
| <b>u6_f</b> | 1.4755      |        |        |        |        | 1.3632 | 1.0114      | 1.0125 | 2.5118 | 2.4730 |
|             | 6-NO2       |        |        |        |        |        | 6-NO2 (90°) |        |        |        |
|             | dCN         | dNO1   | dNO2   | ortho1 | ortho2 | dCN    | dNO1        | dNO2   |        |        |
| <b>u1_g</b> | 1.4941      | 1.2257 | 1.2358 | 2.5196 | 2.2005 | 1.4907 | 1.2289      | 1.2289 |        |        |
| <b>u2_g</b> | 1.5201      | 1.2321 | 1.2253 | 2.4413 | 2.6386 | 1.4987 | 1.2283      | 1.2282 |        |        |
| <b>u3_g</b> | 1.4934      | 1.2271 | 1.2341 | 2.5406 | 2.2470 | 1.4902 | 1.2287      | 1.2286 |        |        |
| <b>u4_g</b> | 1.5209      | 1.2331 | 1.2237 | 2.4681 | 2.6616 | 1.4986 | 1.2282      | 1.2281 |        |        |
| <b>u5_g</b> | 1.5247      | 1.2338 | 1.2223 | 2.4577 | 2.6627 | 1.5000 | 1.2280      | 1.2279 |        |        |
| <b>u6_g</b> | 1.5249      | 1.2348 | 1.2215 | 2.4279 | 2.6676 | 1.5006 | 1.2281      | 1.2279 |        |        |
| <b>u1_f</b> | 1.4897      | 1.2278 | 1.2349 | 2.5116 | 2.2153 | 1.4917 |             |        |        |        |
| <b>u2_f</b> | 1.5149      | 1.2332 | 1.2285 | 2.4480 | 2.6407 | 1.5011 |             |        |        |        |
| <b>u3_f</b> | 1.4879      | 1.2284 | 1.2341 | 2.5406 | 2.2483 | 1.4909 |             |        |        |        |
| <b>u4_f</b> | 1.5144      | 1.2332 | 1.2277 | 2.4805 | 2.6580 | 1.5007 |             |        |        |        |
| <b>u5_f</b> | 1.5163      | 1.2333 | 1.2275 | 2.4758 | 2.6576 | 1.5016 |             |        |        |        |
| <b>u6_f</b> | 1.5170      | 1.2333 | 1.2272 | 2.4571 | 2.6589 | 1.5018 |             |        |        |        |



**Table S31.** Differences between CN bond lengths in formamide and the gas phase,  $\Delta d_{\text{CN}} = d_{\text{CN}}(\text{f}) - d_{\text{CN}}(\text{gas})$ .

| $\Delta d_{\text{CN}}$ | 5-NH2   | 5-NO2   | 5-NO2<br>(90°) | 6-NH2   | 6-NO2   | 6-NO2<br>(90°) |
|------------------------|---------|---------|----------------|---------|---------|----------------|
| <b>u1</b>              | 0.0020  | -0.0158 | -0.0030        | -0.0247 | -0.0044 | 0.0011         |
| <b>u2</b>              | 0.0033  | -0.0165 | -0.0035        | -0.0115 | -0.0051 | 0.0024         |
| <b>u3</b>              | -0.0037 | -0.0128 | -0.0024        | -0.0244 | -0.0055 | 0.0007         |
| <b>u4</b>              | -0.0028 | -0.0131 | -0.0030        | -0.0107 | -0.0065 | 0.0020         |
| <b>u5</b>              | -0.0028 | -0.0130 | -0.0030        | -0.0087 | -0.0084 | 0.0016         |
| <b>u6</b>              | -0.0188 | -0.0064 | 0.0006         | -0.0107 | -0.0079 | 0.0012         |

**Table S32.** CO bond lengths of C=O/C-OH groups in 2 and 4 position of the uracil molecule (in the gas phase).

|           | 5-NH2 |       | 5-NO2 |       | 5-NO2 (90°) |       | 6-NH2 |       | 6-NO2 |       | 6-NO2 (90°) |       |
|-----------|-------|-------|-------|-------|-------------|-------|-------|-------|-------|-------|-------------|-------|
|           | 4-CO  | 2-CO  | 4-CO  | 2-CO  | 4-CO        | 2-CO  | 4-CO  | 2-CO  | 4-CO  | 2-CO  | 4-CO        | 2-CO  |
| <b>u1</b> | 1.234 | 1.229 | 1.218 | 1.221 | 1.222       | 1.222 | 1.232 | 1.227 | 1.226 | 1.220 | 1.225       | 1.221 |
| <b>u2</b> | 1.236 | 1.358 | 1.219 | 1.342 | 1.223       | 1.346 | 1.233 | 1.353 | 1.225 | 1.345 | 1.225       | 1.344 |
| <b>u3</b> | 1.360 | 1.229 | 1.338 | 1.221 | 1.345       | 1.222 | 1.357 | 1.228 | 1.349 | 1.220 | 1.349       | 1.221 |
| <b>u4</b> | 1.361 | 1.360 | 1.337 | 1.344 | 1.344       | 1.347 | 1.357 | 1.356 | 1.347 | 1.346 | 1.347       | 1.346 |
| <b>u5</b> | 1.362 | 1.361 | 1.338 | 1.345 | 1.345       | 1.348 | 1.358 | 1.356 | 1.348 | 1.347 | 1.348       | 1.346 |
| <b>u6</b> | 1.346 | 1.354 | 1.324 | 1.342 | 1.350       | 1.347 | 1.363 | 1.355 | 1.353 | 1.346 | 1.354       | 1.345 |

**Table S33.** cSAR(X) values of C=O/C-OH groups in 2 and 4 position of the uracil molecule in the gas phase (=O groups in red, -OH in blue).

|           | position 4 |        |                |        |        |                | position 2 |        |        |        |                |                |
|-----------|------------|--------|----------------|--------|--------|----------------|------------|--------|--------|--------|----------------|----------------|
|           | 5-NH2      | 5-NO2  | 5-NO2<br>(90°) | 6-NH2  | 6-NO2  | 6-NO2<br>(90°) | 5-NH2      | 6-NH2  | 5-NO2  | 6-NO2  | 5-NO2<br>(90°) | 6-NO2<br>(90°) |
| <b>u1</b> | -0.145     | -0.170 | -0.097         | -0.112 | -0.112 | -0.116         | -0.141     | -0.126 | -0.086 | -0.089 | -0.095         | -0.087         |
| <b>u2</b> | -0.171     | -0.193 | -0.110         | -0.126 | -0.128 | -0.132         | 0.169      | 0.195  | 0.243  | 0.240  | 0.230          | 0.243          |
| <b>u3</b> | 0.144      | 0.131  | 0.199          | 0.182  | 0.187  | 0.181          | -0.165     | -0.153 | -0.103 | -0.107 | -0.116         | -0.106         |
| <b>u4</b> | 0.123      | 0.121  | 0.198          | 0.177  | 0.180  | 0.175          | 0.140      | 0.157  | 0.215  | 0.210  | 0.199          | 0.210          |
| <b>u5</b> | 0.117      | 0.116  | 0.192          | 0.172  | 0.175  | 0.170          | 0.141      | 0.156  | 0.217  | 0.209  | 0.200          | 0.210          |
| <b>u6</b> | 0.100      | 0.125  | 0.128          | 0.178  | 0.174  | 0.176          | 0.169      | 0.161  | 0.230  | 0.214  | 0.206          | 0.214          |

**Table S34.** Ranges and average values of cSAR(X) of C=O/C-OH groups in 2 and 4 position of the uracil molecule, in the gas phase.

|       | range | average |
|-------|-------|---------|
| C4-OH | 0.099 | 0.159   |
| C2-OH | 0.103 | 0.199   |
| C4=O  | 0.096 | -0.134  |
| C2=O  | 0.078 | -0.115  |
